# Supplementary material
Source: Springer Nature journal article supplement (https://www.springermedizin.de/resource/supplementary/12865_2013_580_MOESM13_ESM.pdf/9428280)
Supplement: MOESM13 [file 9428280]

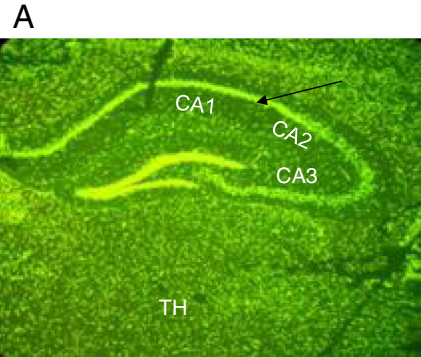

Showing binding in  
Hippocampus and all over  
mid brain areas - 40X

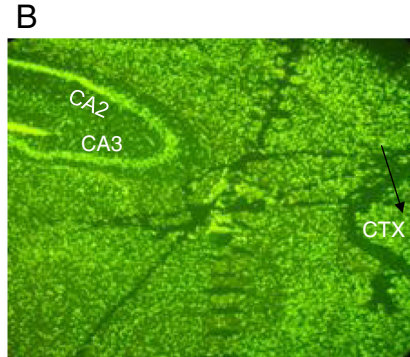

Binding in the Cortex - 40X

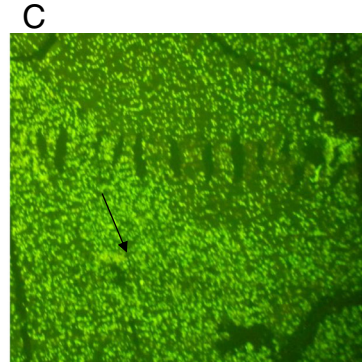

Binding the Amygdala - 40X

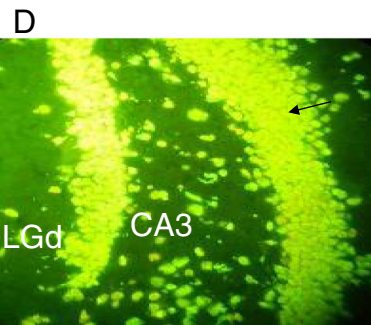

Hippocampus - 250 X

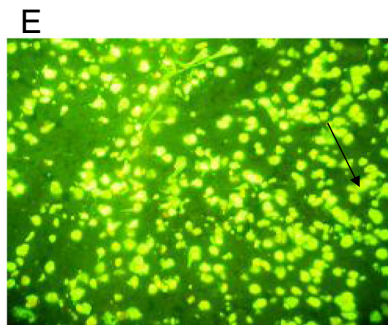

Cortex - 250X

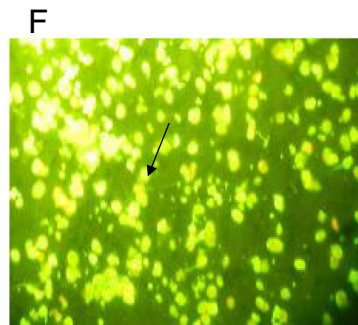

Amygdala - 250X
